# Supplementary material
Source: publisher site journal article supplement (https://www.dovepress.com/article/316864)
Supplement: Supplementary file 1 [file get_supplementary_file.php]

**Supplementary Table 1 Association between TyG index and progression of NAFLD in ordered logistic regression models**

|            | <b>Unadjusted</b>   |          | <b>Model 1</b>      |          | <b>Model 2</b>      |          | <b>Model 3</b>      |          |
|------------|---------------------|----------|---------------------|----------|---------------------|----------|---------------------|----------|
|            | OR                  | <i>P</i> | OR                  | <i>P</i> | OR                  | <i>P</i> | OR                  | <i>P</i> |
| Quartile 1 | 1(Ref)              |          | 1(Ref)              |          | 1(Ref)              |          | 1(Ref)              |          |
| Quartile 2 | 1.151 (1.008,1.315) | 0.038    | 1.138(0.996,1.301)  | 0.057    | 1.155 (1.002,1.332) | 0.047    | 1.151 (0.998,1.328) | 0.053    |
| Quartile 3 | 1.268 (1.112,1.446) | <0.001   | 1.272 (1.115,1.450) | <0.001   | 1.347 (1.171,1.548) | <0.001   | 1.345 (1.169,1.547) | <0.001   |
| Quartile 4 | 1.472 (1.294,1.675) | <0.001   | 1.458(1.282,1.659)  | <0.001   | 1.522 (1.327,1.745) | <0.001   | 1.519 (1.325,1.743) | <0.001   |

Model 1: Adjusted for sex, age; Model 2: Adjusted for sex, age, SBP, DBP, BMI, HDL, LDL, FPG, TG, ALT, Scr; Model 3: Adjusted for sex, age, SBP, DBP, BMI, HDL, LDL, FPG, TG, ALT, Scr, diet, smoking, alcohol consumption and physical activity.

**Supplementary Table 2 Association between TyG index and improvement of NAFLD in ordered logistic regression models**

|            | <b>Unadjusted</b>   |          | <b>Model 1</b>      |          | <b>Model 2</b>      |          | <b>Model 3</b>      |          |
|------------|---------------------|----------|---------------------|----------|---------------------|----------|---------------------|----------|
|            | OR                  | <i>P</i> | OR                  | <i>P</i> | OR                  | <i>P</i> | OR                  | <i>P</i> |
| Quartile 1 | 1(Ref)              |          | 1(Ref)              |          | 1(Ref)              |          | 1(Ref)              |          |
| Quartile 2 | 0.874 (0.787,0.970) | 0.012    | 0.879(0.791,0.976)  | 0.016    | 0.874 (0.782,0.978) | 0.018    | 0.879 (0.786,0.983) | 0.024    |
| Quartile 3 | 0.817 (0.735,0.907) | <0.001   | 0.820 (0.738,0.911) | <0.001   | 0.808 (0.722,0.904) | <0.001   | 0.814 (0.728,0.911) | <0.001   |
| Quartile 4 | 0.797 (0.718,0.885) | <0.001   | 0.802(0.722,0.890)  | <0.001   | 0.787 (0.704,0.880) | <0.001   | 0.790 (0.707,0.884) | <0.001   |

Model 1: Adjusted for sex, age; Model 2: Adjusted for sex, age, SBP, DBP, BMI, HDL, LDL, FPG, TG, ALT, Scr; Model 3: Adjusted for sex, age, SBP, DBP, BMI, HDL, LDL, FPG, TG, ALT, Scr, diet, smoking, alcohol consumption and physical activity.

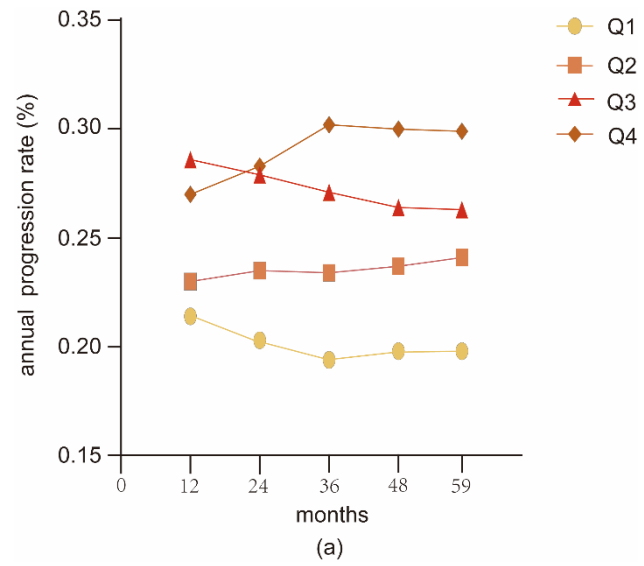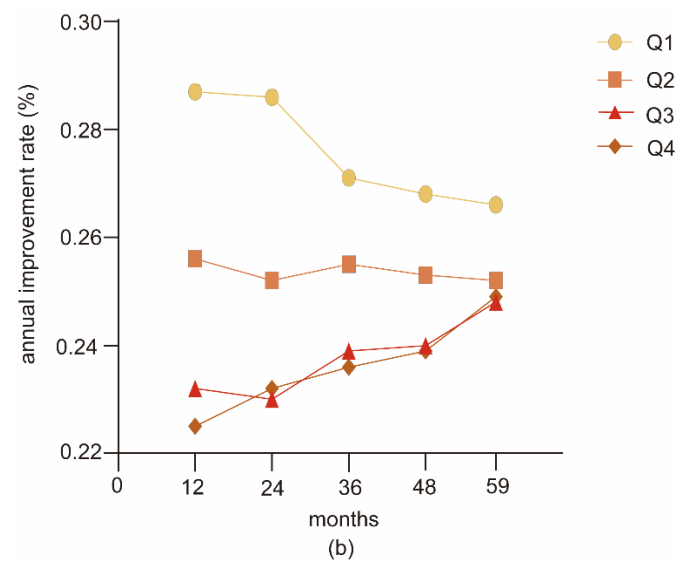

**Supplementary Figure 1** Trends of the outcomes of NAFLD against time. **(a)**. The annual progression rate over time. **(b)**. The annual improvement rate over time.
